# Supplementary material for: Elasto-morphology of P3HT:PCBM bulk heterojunction organic solar cells
Source: Royal Society of Chemistry journal article supplement (doi:10.1039/d0sm00849d), 2020-01-01
Supplement: d0sm00849d1.pdf [file d0sm00849d1.pdf]

## SUPPLEMENTARY INFORMATION for

### Elasto-morphology of P3HT:PCBM Bulk Heterojunction Organic Solar Cells

Joydeep Munshi<sup>1</sup>, TeYu Chien<sup>2</sup>, Wei Chen<sup>3</sup> and Ganesh Balasubramanian<sup>1,†</sup>

<sup>1</sup>*Department of Mechanical Engineering & Mechanics, Lehigh University, Bethlehem, PA, USA  
18015*

<sup>2</sup>*Department of Physics & Astronomy, University of Wyoming, Laramie, WY, USA 82071*

<sup>3</sup>*Department of Mechanical Engineering, Northwestern University, Evanston, IL, USA 60208*

#### Simulation procedure

We simulate solvent evaporation followed by thermal annealing of the solvent-free morphology. Typical solvent evaporation is simulated under an NPT (pressure constrained at 1 atm. and temperature at 298 K) ensemble by removing 1.25% of the CB molecules from the energy-minimized ternary mixture after every 3 ns (nanosecond) of time interval from a simulation box with 3-dimensional (3D) periodic boundary condition (PBC). Thermal annealing of the solvent-free mixture is achieved by gradually increasing the temperature from 298 K to 698 K over three successive computational steps. This leads to an overall simulation time  $\sim 3 \mu\text{s}$  to prepare thermally annealed BHJ composite structures as shown in Figure S1. Simulation details for various cases simulated are presented in Table S1. Considering a mean time-scaling factor  $\sim 4$ , the BHJ morphology obtained from CGMD simulations is equivalent to  $\sim 12 \mu\text{s}$  of all-atom MD simulation time as also explained elaborately in our previous effort [1]. After achieving solvent-free thermally annealed 3D microstructure, morphological parameters such as domain size, interfacial area to

---

<sup>†</sup> Corresponding author. Email: [bganesh@lehigh.edu](mailto:bganesh@lehigh.edu). Phone: +1-610-758-3784.

Address: Packard Laboratory 561, 19 Memorial Drive West, Bethlehem, PA 18015, USA.

volume ratio and percolation ratio are calculated from a spatially discretized structure as shown in Figure S2. Under the assumption of finite element scheme, we discretize the overall simulation box into small voxels of dimensions  $\sim 0.5 \times 0.5 \times 0.5 \text{ nm}^3$ . The dimension of each voxel is limited by the smallest Van der Waals diameter of each CG beads considered.

**Table S1:** MD simulation parameters related to energy minimization, equilibration (under NVT and NPT ensembles) and the solvent evaporation simulation are listed. Velocity rescale and Parrinello-Rahman methods are used as thermostat and barostat, respectively, to achieve smooth convergence for temperature and pressure constraints.

|                                    | <b>NVT</b>           | <b>NPT</b>           | <b>Solvent</b>        | <b>Thermal</b>        | <b>Uniaxial</b>            |
|------------------------------------|----------------------|----------------------|-----------------------|-----------------------|----------------------------|
|                                    | <b>Equilibration</b> | <b>Equilibration</b> | <b>Evaporation</b>    | <b>Annealing</b>      | <b>straining</b>           |
|                                    |                      |                      |                       |                       | <b>(NE-CGMD)</b>           |
| Algorithm                          | Leap frog            | Leap frog            | Leap frog             | Leap frog             | Leap frog                  |
| Time step ( $fs$ )                 | 20                   | 20                   | 20                    | 20                    | 20                         |
| LJ cut-off<br>scheme               | Verlet               | Verlet               | Verlet                | Verlet                | Verlet                     |
| Cut-off radius<br>( $nm$ )         | 1.1                  | 1.1                  | 1.1                   | 1.1                   | 1.1                        |
| Thermostat                         | Berendsen            | Berendsen            | Velocity-<br>rescale  | Velocity-<br>rescale  | Velocity-<br>rescale       |
| Barostat                           | Berendsen            | Berendsen            | Parrinello-<br>Rahman | Parrinello-<br>Rahman | Parrinello-<br>Rahman      |
| Coupling<br>constant ( $ps^{-1}$ ) | 1                    | 2                    | 15                    | 15                    | 15                         |
| Temperature<br>( $K$ )             | 298                  | 298                  | 298                   | 298-698               | 298-698                    |
| Pressure ( $atm.$ )                |                      | 1                    | 1                     | 1                     | 1<br>( <i>transverse</i> ) |

|             | <b>NVT</b>           | <b>NPT</b>           | <b>Solvent</b>     | <b>Thermal</b>   | <b>Uniaxial</b>       |
|-------------|----------------------|----------------------|--------------------|------------------|-----------------------|
|             | <b>Equilibration</b> | <b>Equilibration</b> | <b>Evaporation</b> | <b>Annealing</b> | <b>straining</b>      |
|             |                      |                      |                    |                  | <b>(NE-CGMD)</b>      |
| Deformation |                      |                      |                    |                  | $1 \times 10^{-4}$    |
| (nm/ps)     |                      |                      |                    |                  | <i>(longitudinal)</i> |

*Table S2: Simulation details for different P3HT:PCBM BHJ active layers considered.*

| <b>Weight ratio<br/>(P3HT:PCBM)</b> | <b>Chain<br/>length</b> | <b>P3HT<br/>molecules</b> | <b>PCBM<br/>molecules</b> | <b>Oligomer<br/>weight<br/>fraction<br/>(%)</b> | <b>Oligomer<br/>molecules</b> | <b>Dimension of<br/>simulation<br/>box (nm<sup>3</sup>)</b> |
|-------------------------------------|-------------------------|---------------------------|---------------------------|-------------------------------------------------|-------------------------------|-------------------------------------------------------------|
| 1.0:0.5                             | 120                     | 119                       | 1306                      | 0                                               | 0                             | 20×20×12.110                                                |
| 1.0:0.8                             | 120                     | 119                       | 2090                      | 0                                               | 0                             | 20×20×14.335                                                |
| 1.0:1.0                             | 120                     | 119                       | 2612                      | 0                                               | 0                             | 20×20×15.732                                                |
| 1.0:2.0                             | 120                     | 119                       | 5225                      | 0                                               | 0                             | 20×20×14.360                                                |
| 1.0:0.8                             | 120                     | 119                       | 2213                      | 5                                               | 90                            | 20×20×15.258                                                |
| 1.0:0.8                             | 120                     | 119                       | 2319                      | 10                                              | 180                           | 20×20×15.957                                                |
| 1.0:0.8                             | 120                     | 119                       | 2424                      | 15                                              | 270                           | 20×20×16.726                                                |
| 1.0:0.8                             | 120                     | 119                       | 2529                      | 20                                              | 360                           | 20×20×17.441                                                |

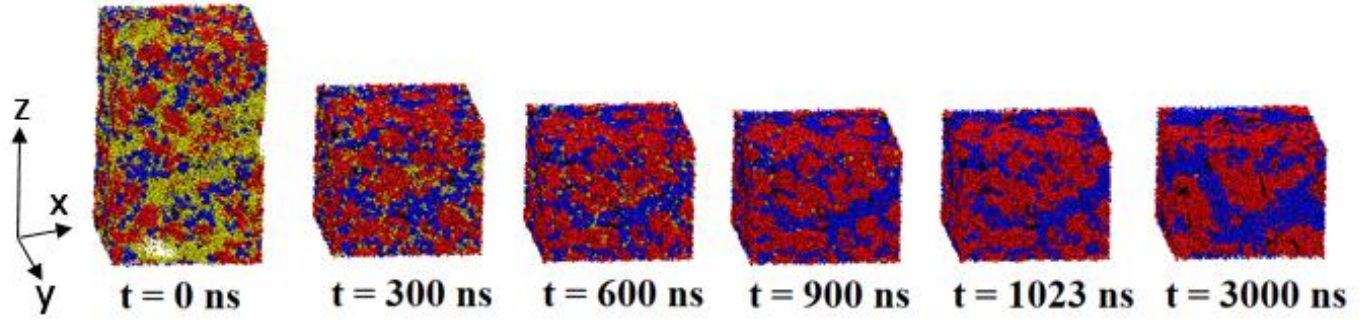

**Figure S1:** Simulated evaporation of P3HT:PCBM BHJ active layers from CB solvent at different time steps. More than 50% of CB is observed to evaporate at  $t = 300$  ns. Morphology evaluation and dynamics of evaporation and thermal annealing demonstrate phase-separated BHJ microstructure.

**(a)**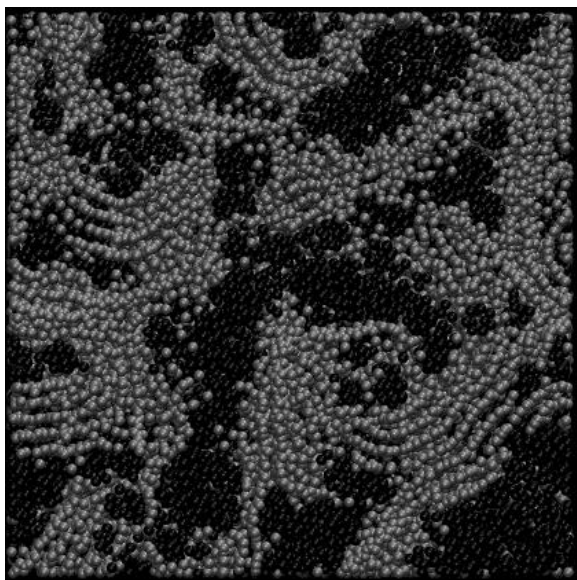**(b)**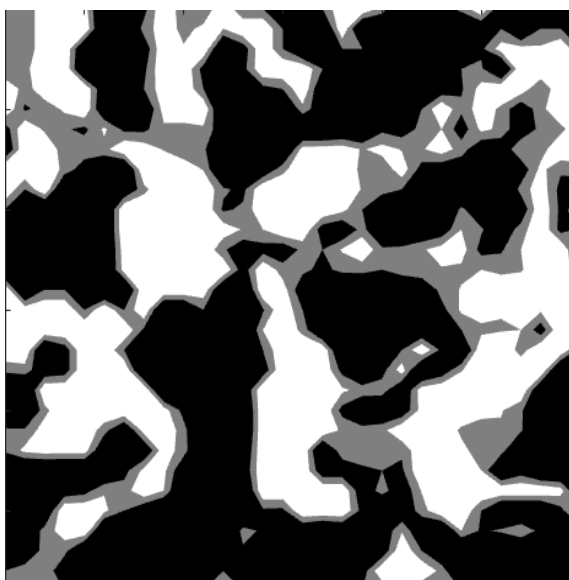

*Figure S2: Comparison of morphologies with spatial discretization (sampled along the x-y plane) for different weight ratios. (a) Snapshots of the BHJ morphology for 1:0.08 weight ratio of P3HT:PCBM. P3HT molecules are represented using grey beads and PCBM molecules are denoted using black beads. (b) The corresponding spatially discretized morphologies for 1:0.08 weight ratio. All the representations are across the x-y plane. White regions represent pure P3HT domains while black represents pure PCBM. Grey areas indicate a mixture of P3HT and PCBM.*

## References

- S1. Munshi, J., R. Dulal, T. Chien, W. Chen, and G. Balasubramanian, *Solution Processing Dependent Bulk Heterojunction Nanomorphology of P3HT/PCBM Thin Films*. ACS applied materials & interfaces, 2019. **11**(18): p. 17056-17067.
